# Supplementary material for: Neochlorogenic acid anchors MCU-based calcium overload for cancer therapy
Source: Royal Society of Chemistry journal article supplement (doi:10.1039/d1fo01393a), 2021-01-01
Supplement: d1fo01393a1.pdf [file d1fo01393a1.pdf]

# 1 Supplementary materials

2

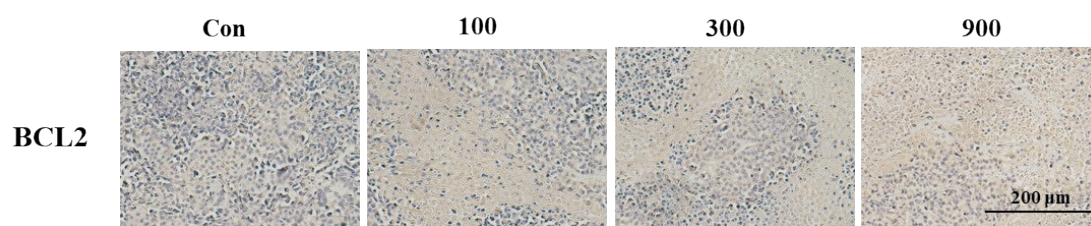

4 **Figure S1.** IHC staining for BCL2 in solid tumors.

5

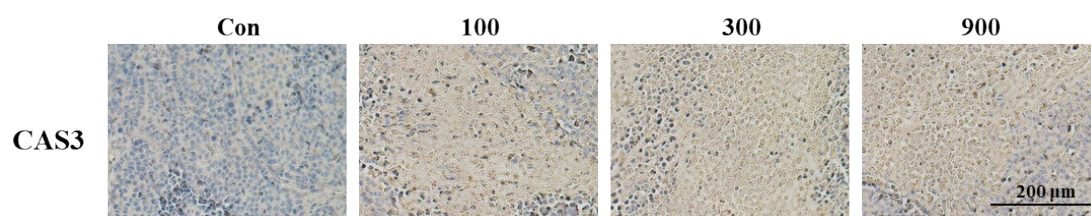

7 **Figure S2.** IHC staining for caspase-3 in solid tumors.

8

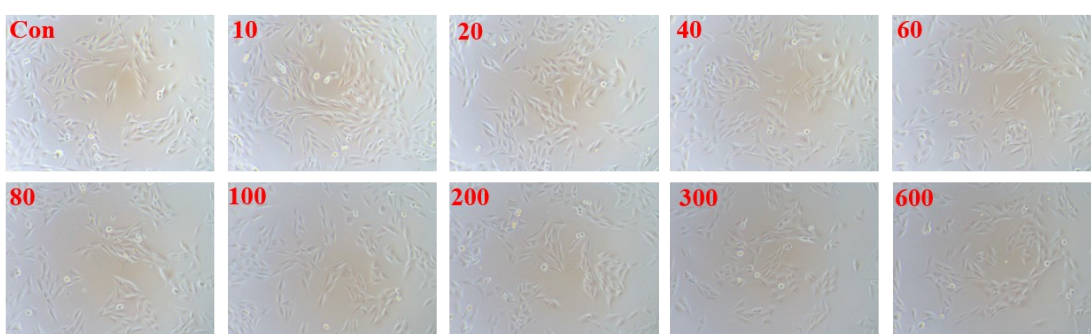

10 **Figure S3.** The cellular morphology of L6 with NA treatments.

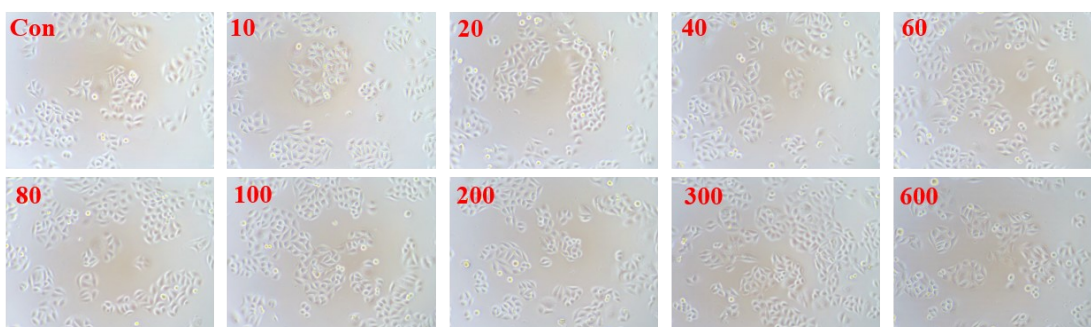

12 **Figure S4.** The cellular morphology of LO2 with NA treatments.

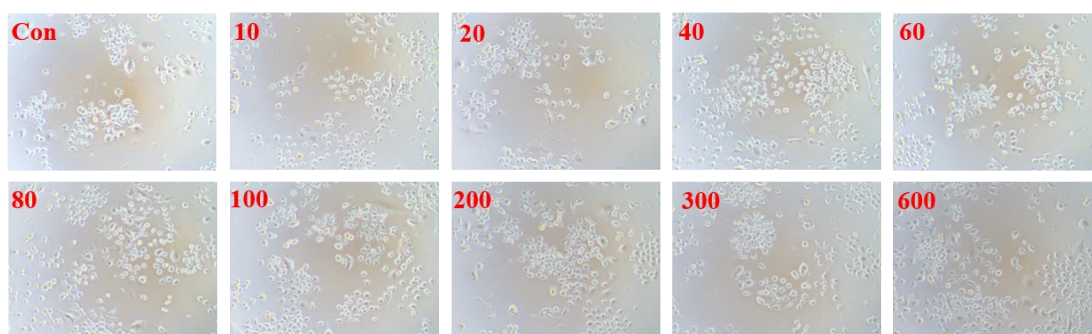

**Figure S5.** The cellular morphology of RAW264.7 with NA treatments.

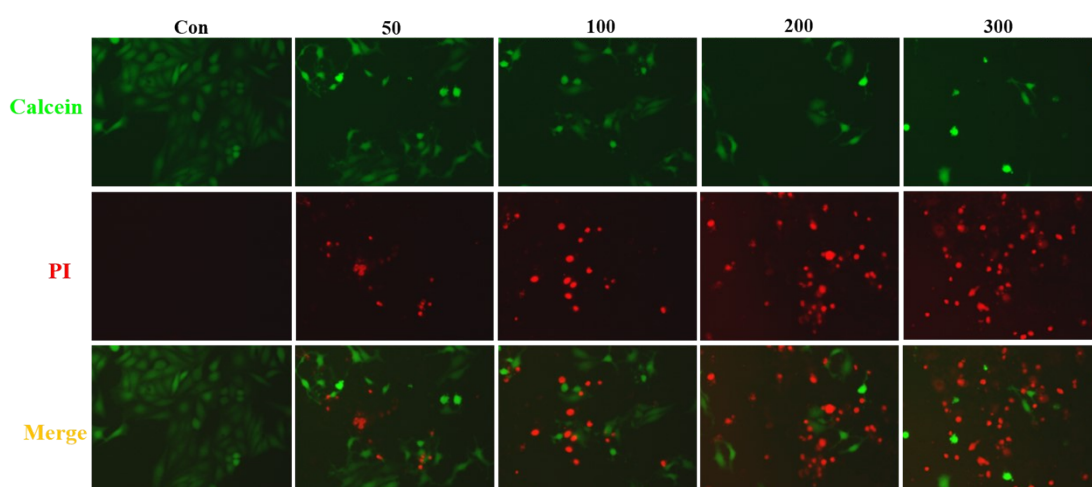

**Figure S6.** Calcein and PI staining of HepG2 cells.

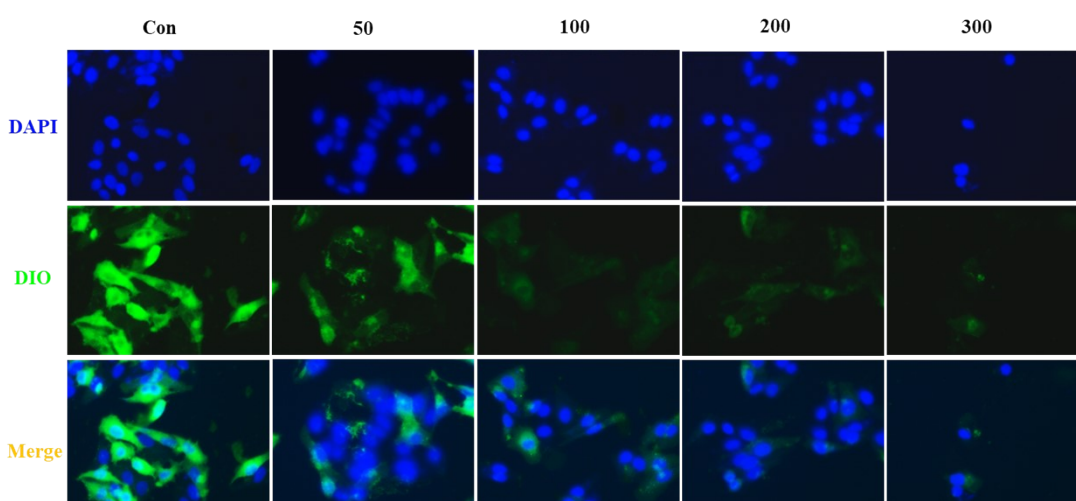

**Figure S7.** DAPI and DIO staining of HepG2 cells.

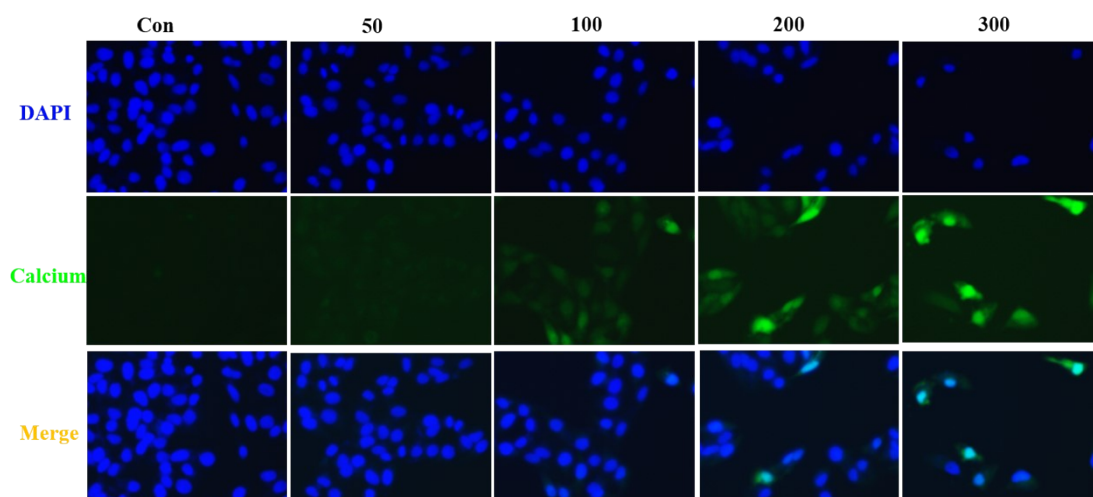

22

23 **Figure S8.** DAPI and Fluo-4AM staining of HepG2 cells.

24

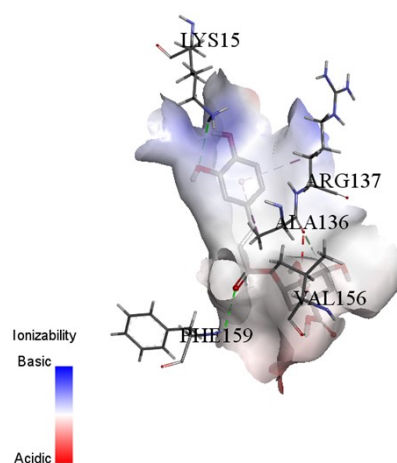

25

26 **Figure S9.** Ionizability interactions between NA and MCU.

27



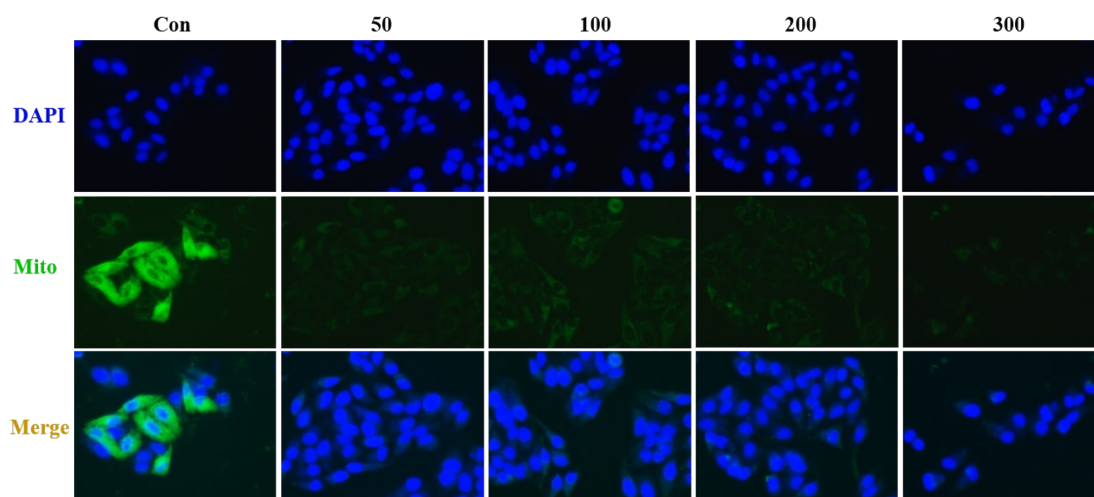

28

29 **Figure S10.** DAPI and Mito-tracker staining of HepG2 cells.

30

31

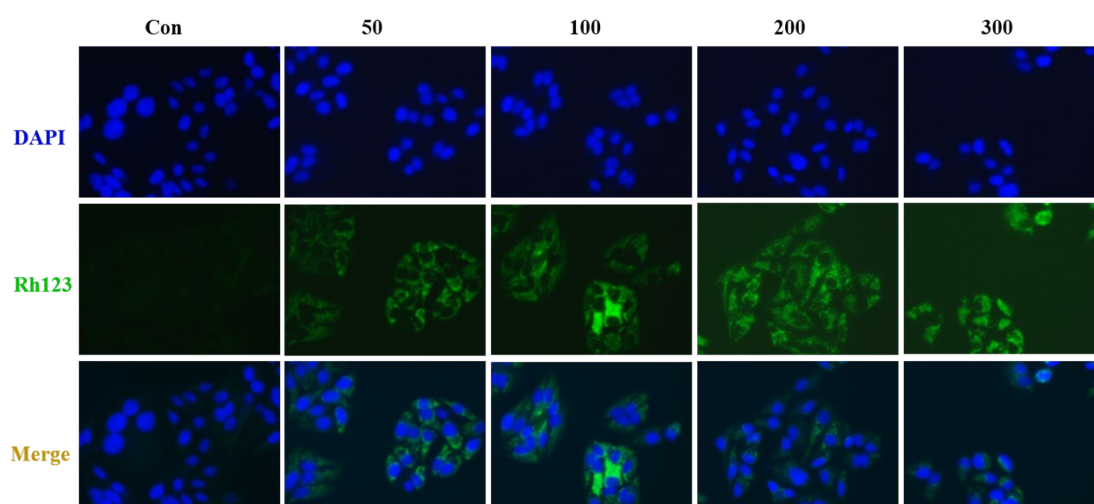

32

33 **Figure S11.** DAPI and Rh123 staining of HepG2 cells.

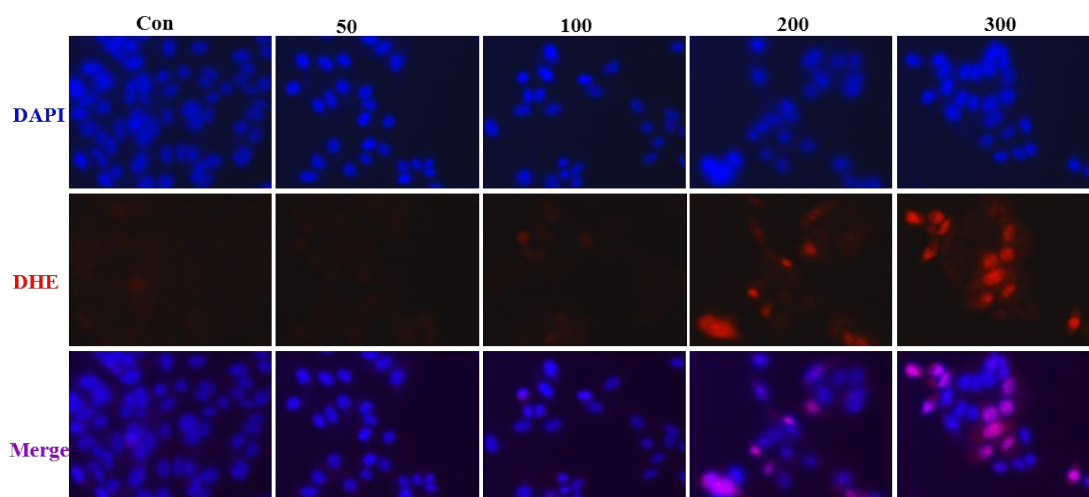

34

35 **Figure S12.** DAPI and DHE staining of HepG2 cells.
